# Supplementary material for: A cobalt complex redox shuttle for dye-sensitized solar cells with high open-circuit potentials
Source: PubMed Central journal article supplement — Nat Commun. 2012 Jan 17;3:631–. doi: 10.1038/ncomms1655 (PMC3272578; doi:10.1038/ncomms1655), 2012-01-17
Supplement: ncomms1655-s1.pdf [file ncomms1655-s1.pdf]

## SUPPLEMENTARY INFORMATION

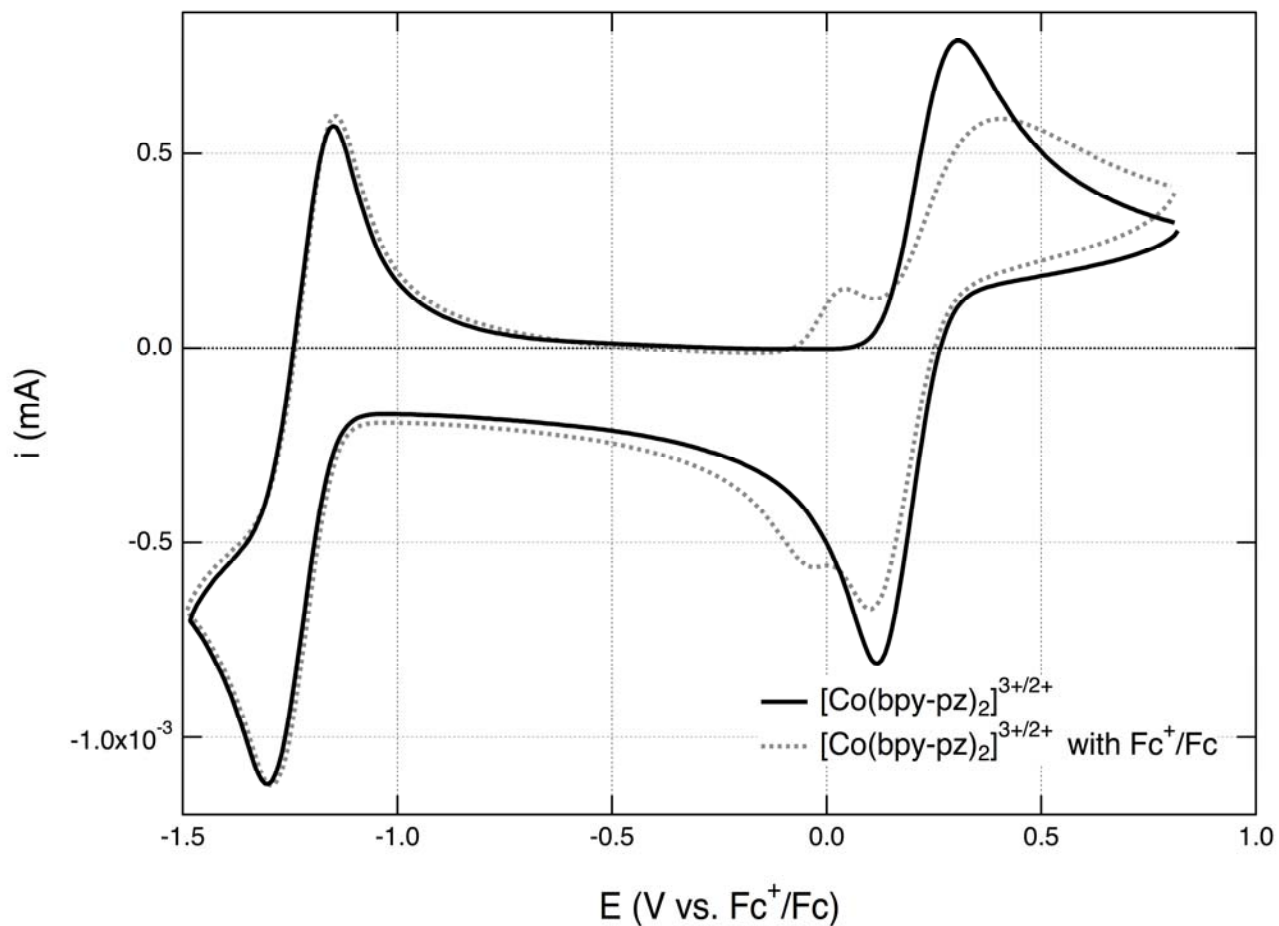

**Supplementary Figure S1. Cyclic voltammetry of the  $[\text{Co}(\text{bpy-pz})_2]^{2+}$  complex.** Cyclic voltammetry experiments measured using 2 mM solution of  $[\text{Co}(\text{bpy-pz})_2]^{2+}$  in acetonitrile with 0.1 M tetrabutylammonium hexafluorophosphate ( $\text{TBAPF}_6$ ) electrolyte with Pt deposited on FTO ( $0.7 \text{ cm}^2$ ), a Pt plate and a Pt wire used as working, counter and reference electrode, respectively.

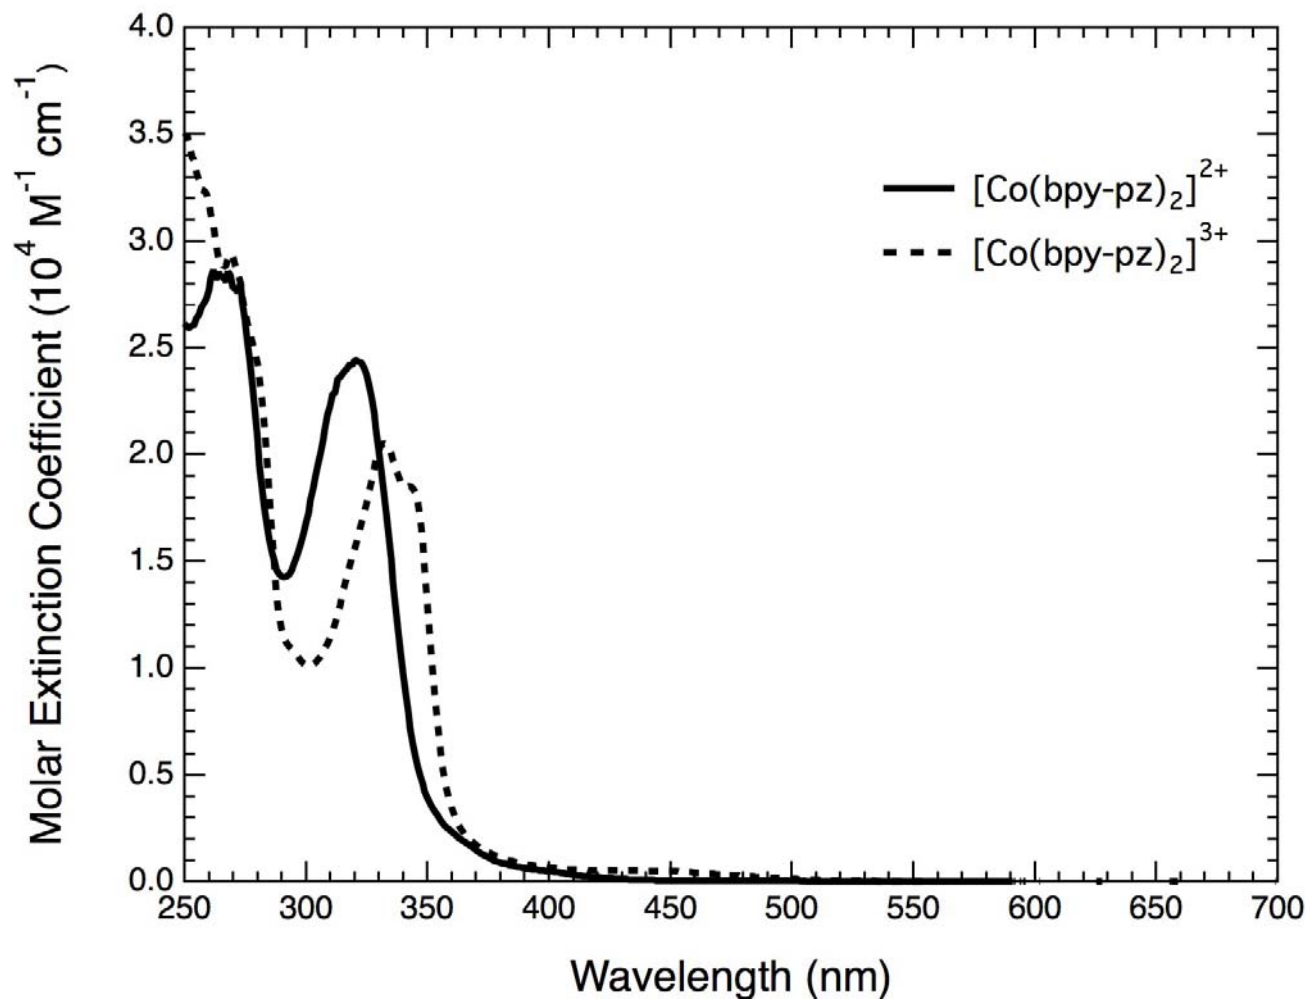

**Supplementary Figure S2. UV-Vis absorption spectra of cobalt complexes.** The solid line show absorption properties of the reduced state of the cobalt complex  $[\text{Co}(\text{bpy-pz})_2]^{2+}$  and the dashed line is oxidized state of the cobalt complex  $[\text{Co}(\text{bpy-pz})_2]^{3+}$  measured by dissolving in acetonitrile solution.

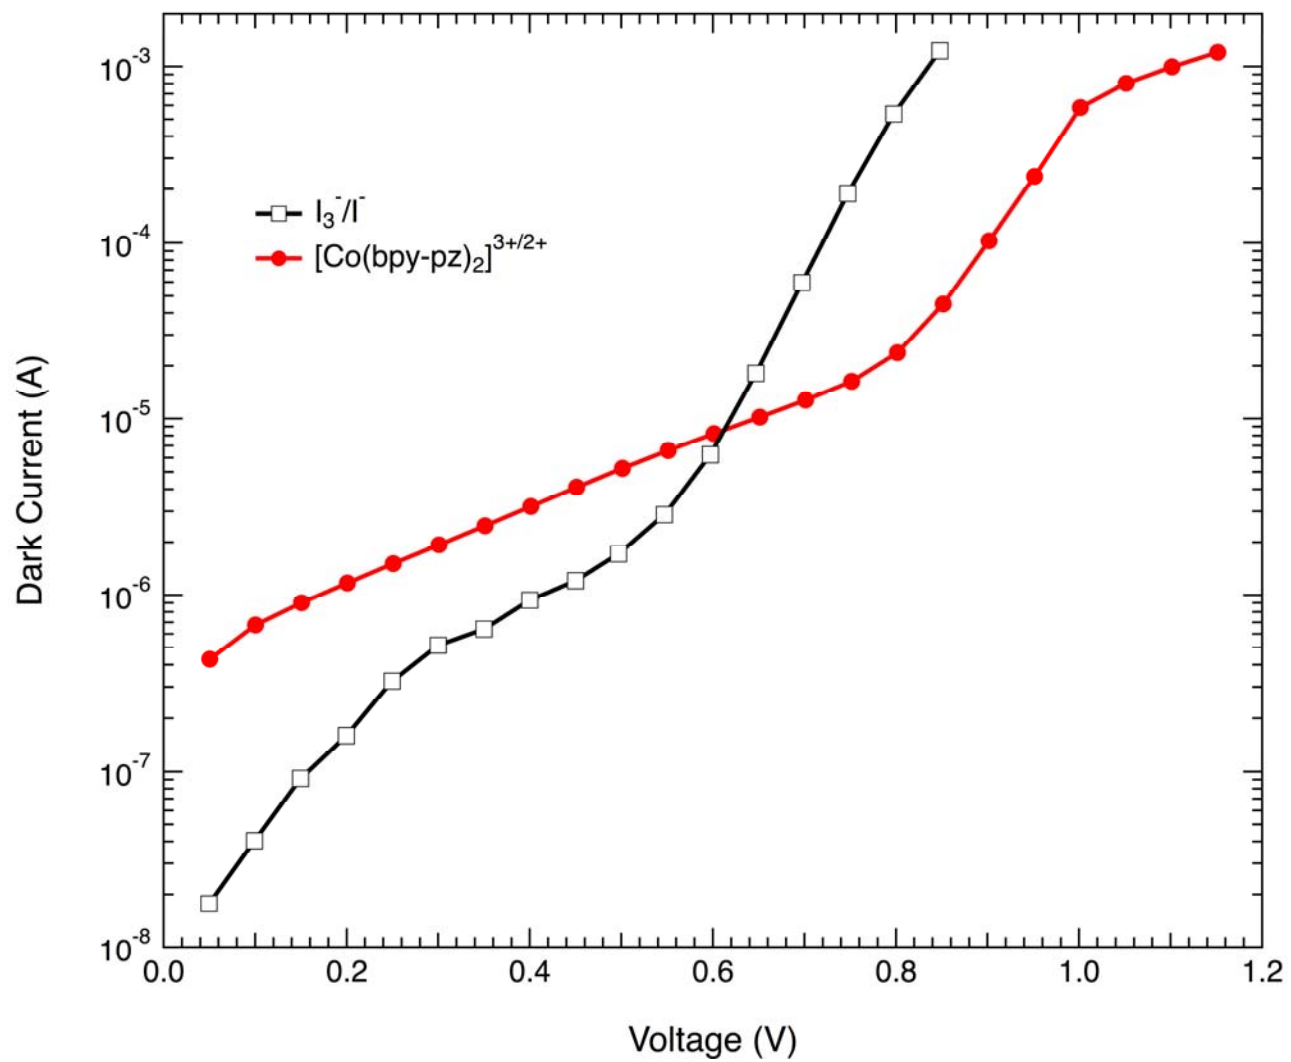

**Supplementary Figure S3. Dark currents of the redox systems.** Comparison of the  $I_3^-/I^-$  and  $[Co(bpy-pz)_2]^{3+/2+}$  redox systems dark current near 0 V measured by the EIS.

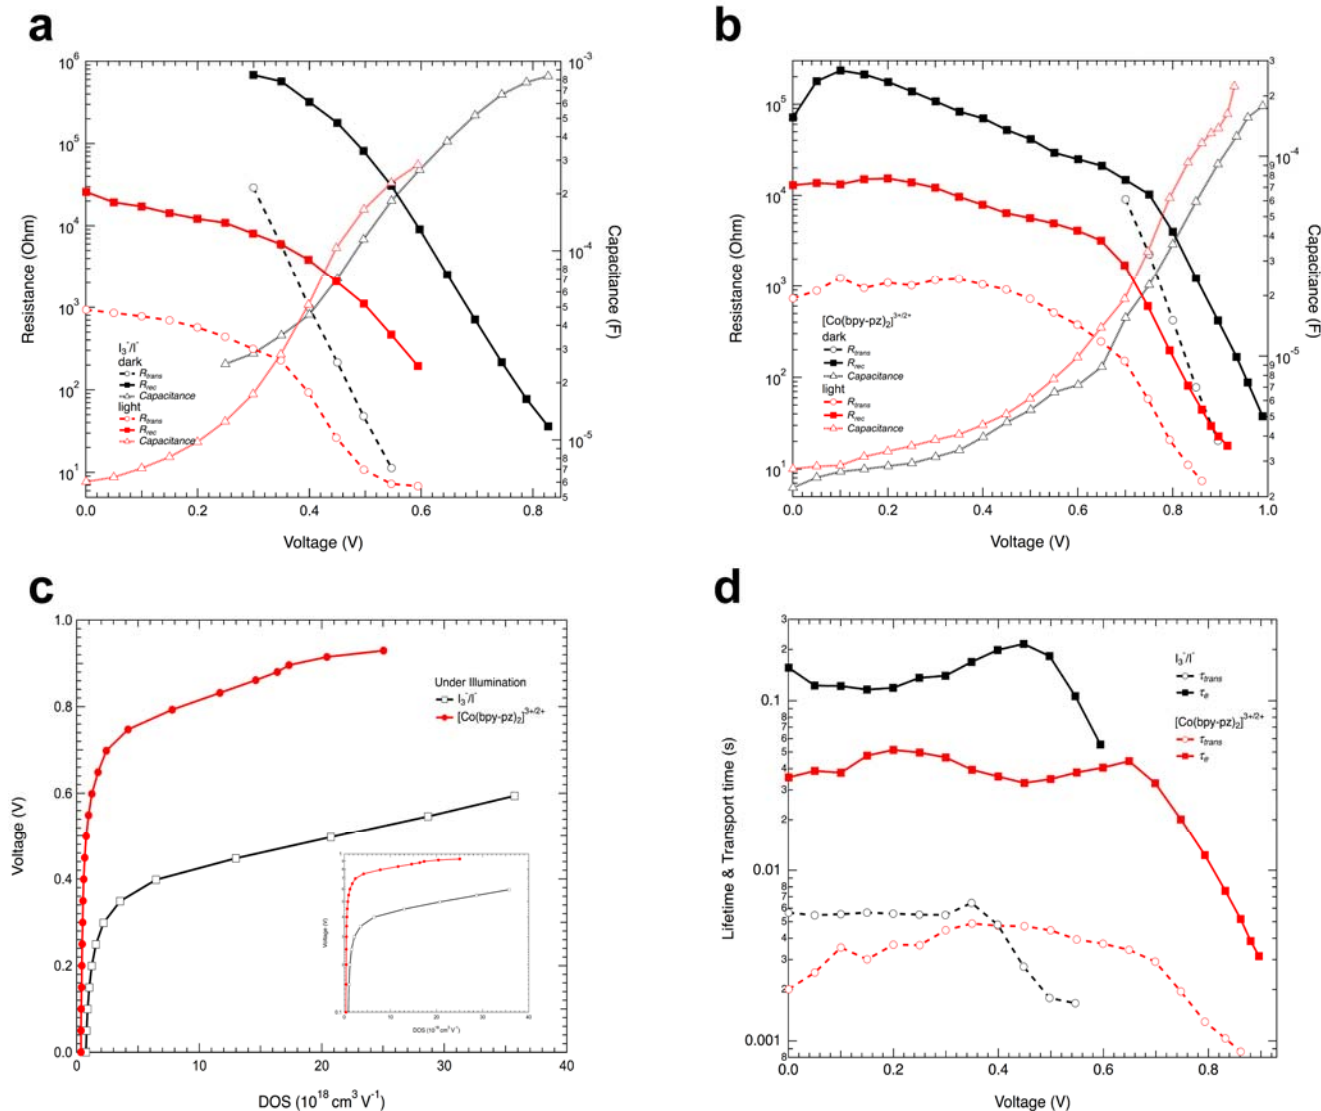

**Supplementary Figure S4. EIS results of  $I_3^-/I^-$  and  $[Co(bpy-pz)_2]^{3+/2+}$  system.** (a) Transport resistance ( $R_{trans}$ ), recombination resistance ( $R_{rec}$ ), chemical capacitance, and charge transfer resistance ( $R_{CT}$ ) of  $I_3^-/I^-$ -based DSCs at dark (black lines) and 1 sun (red lines). (b) Transport resistance ( $R_{trans}$ ), recombination resistance ( $R_{rec}$ ), chemical capacitance, and charge transfer resistance ( $R_{CT}$ ) of  $[Co(bpy-pz)_2]^{3+/2+}$ -based DSCs at dark (black lines) and 1 sun (red lines). (c) Density of states (DOS) as function of potential of the  $[Co(bpy-pz)_2]^{3+/2+}$  (red lines and closed circles) and  $I_3^-/I^-$  (black lines and open squares) system based DSC under illumination (insert with a logarithmic scale). (d) Electron lifetime (solid lines with closed squares) and transport time (dashed lines with open circles) of  $I_3^-/I^-$ -based (black lines) and  $[Co(bpy-pz)_2]^{3+/2+}$ -based (red lines) DSCs as function of bias voltage.

**Supplementary Table S1. *J-V* characterization data of the DSCs.** The short circuit current, open circuit potential and fill factor data were obtained employing  $[\text{Co}(\text{bpy-pz})_2]^{3+/2+}$  and  $\text{I}_3^-/\text{I}^-$  redox systems with 5.6  $\mu\text{m}$  thin thick  $\text{TiO}_2$  films under different incident light intensity conditions.

| Redox                                  | $I_0$ ( $\text{mW cm}^{-2}$ ) | $J_{sc}$ ( $\text{mA cm}^{-2}$ ) | $V_{oc}$ (mV) | $FF$ (%)       | $\eta$ (%)      |
|----------------------------------------|-------------------------------|----------------------------------|---------------|----------------|-----------------|
| $[\text{Co}(\text{bpy-pz})_2]^{3+/2+}$ | 100                           | $12.33 \pm 0.31$                 | $1016 \pm 4$  | $69.3 \pm 0.4$ | $8.66 \pm 0.19$ |
|                                        | 51                            | $6.50 \pm 0.10$                  | $995 \pm 3$   | $74.0 \pm 0.7$ | $9.38 \pm 0.22$ |
|                                        | 9.5                           | $1.23 \pm 0.02$                  | $935 \pm 6$   | $77.0 \pm 1.8$ | $9.35 \pm 0.40$ |
| $\text{I}^-/\text{I}_3^-$              | 100                           | $13.01 \pm 0.23$                 | $745 \pm 12$  | $66.5 \pm 0.3$ | $6.45 \pm 0.14$ |
|                                        | 51                            | $6.70 \pm 0.10$                  | $734 \pm 9$   | $70.0 \pm 0.1$ | $6.80 \pm 0.05$ |
|                                        | 9.5                           | $1.29 \pm 0.15$                  | $703 \pm 10$  | $73.7 \pm 0.1$ | $7.01 \pm 0.02$ |

**Supplementary Table S2.  $J$ - $V$  characterization data of the DSCs.** The short circuit current, open circuit potential and fill factor data were obtained employing  $[\text{Co}(\text{bpy-pz})_2]^{3+/2+}$  with various  $\text{TiO}_2$  film thickness under different incident light intensity conditions.

| $\text{TiO}_2$ ( $\mu\text{m}$ ) | $I_0$ ( $\text{mW cm}^{-2}$ ) | $J_{sc}$ ( $\text{mA cm}^{-2}$ ) | $V_{oc}$ (mV) | $FF$ (%)       | $\eta$ (%)       |
|----------------------------------|-------------------------------|----------------------------------|---------------|----------------|------------------|
| 2.8                              | 100                           | $10.84 \pm 0.13$                 | $1030 \pm 10$ | $67.4 \pm 0.1$ | $7.51 \pm 0.07$  |
|                                  | 51                            | $5.71 \pm 0.12$                  | $1011 \pm 7$  | $72.3 \pm 0.7$ | $8.21 \pm 0.05$  |
|                                  | 9.5                           | $1.09 \pm 0.03$                  | $955 \pm 5$   | $77.1 \pm 0.7$ | $8.47 \pm 0.23$  |
| 5.6 + 5                          | 100                           | $13.44 \pm 0.02$                 | $1017 \pm 5$  | $68.6 \pm 0.2$ | $9.37 \pm 0.21$  |
|                                  | 51                            | $7.07 \pm 0.01$                  | $997 \pm 3$   | $73.6 \pm 0.1$ | $10.18 \pm 0.16$ |
|                                  | 9.5                           | $1.32 \pm 0.01$                  | $936 \pm 2$   | $76.0 \pm 0.1$ | $9.88 \pm 0.07$  |
| 4.0 + 4.5<br>with<br>PProDOT     | 100                           | $13.08 \pm 0.03$                 | $999 \pm 3$   | $75.2 \pm 3$   | $9.90 \pm 0.38$  |
|                                  | 51                            | $7.00 \pm 0.13$                  | $981 \pm 6$   | $77.1 \pm 3$   | $10.36 \pm 0.52$ |
|                                  | 9.5                           | $1.32 \pm 0.04$                  | $919 \pm 6$   | $79.2 \pm 3$   | $10.11 \pm 0.62$ |

**Supplementary Table S3. The charge transfer resistance ( $R_{CT}$ ) at the counter electrode.** Two similar electrodes with the electrolyte at a given distance 65  $\mu\text{m}$  between them leaving 0.6 x 0.6  $\text{cm}^2$  are assembled and electrochemical impedance spectroscopy (EIS) under dark conditions was performed at 0V in a frequency range between 1 MHz and 0.1 Hz in 50mV steps. The diffusion coefficient of  $[\text{Co}(\text{bpy-pz})_2]^{3+/2+}$  redox system determined from this measurement were between  $2 \cdot 10^{-6}$  to  $4 \cdot 10^{-6}$   $\text{cm}^2/\text{s}$ .

| Redox                                  | Pt   | PProDOT |
|----------------------------------------|------|---------|
| $[\text{Co}(\text{bpy-pz})_2]^{3+/2+}$ | ~50  | ~2.5    |
| $\text{I}_3^-/\text{I}^-$              | ~0.8 | -       |
